# Supplementary material for: Effect of strontium on the performance of Ni/CBV20A catalyst in partial oxidation of methane for syngas and hydrogen production
Source: Royal Society of Chemistry journal article supplement (doi:10.1039/d4ra06426g), 2025-01-01
Supplement: d4ra06426g1.pdf [file d4ra06426g1.pdf]

## Supporting Information

### Effect of Strontium on the performance of Ni/CBV20A catalyst in partial oxidation of methane for syngas and hydrogen production

Abdulaziz Al-Anazi<sup>a</sup>, Marie-Nour Kaydouh<sup>b</sup>, Omer Bellahwel<sup>a</sup>, Ahmed A. Ibrahim<sup>a</sup>, Abdulaziz A.M. Abahussain<sup>a</sup>, Vijay Kumar Srivastava<sup>c</sup>, Anis H. Fakeeha<sup>a</sup>, Naif S. Almuqati<sup>d</sup>, Raja Alotaibi<sup>d</sup>, Ahmed S. Al-Fatesh<sup>a\*</sup>, Nissrine El Hassan<sup>b\*</sup>

---

<sup>a</sup> Chemical Engineering Department, College of Engineering, King Saud University, P.O. Box 800, Riyadh 11421, Saudi Arabia; [aalfatesh@ksu.edu.sa](mailto:aalfatesh@ksu.edu.sa)

<sup>b</sup> Petroleum Engineering Program, School of Engineering, Lebanese American University, P.O. Box 36, Byblos, Lebanon; [nissrine.elhassan@lau.edu.lb](mailto:nissrine.elhassan@lau.edu.lb)

<sup>c</sup> Department of Chemistry, Indus University, Ahmedabad, Gujarat 382115, India.

<sup>d</sup> Institute of Refining and Petrochemicals Technologies, King Abdulaziz City for Science and Technology (KACST), P.O. Box 6086, Riyadh 11442, Saudi Arabia.

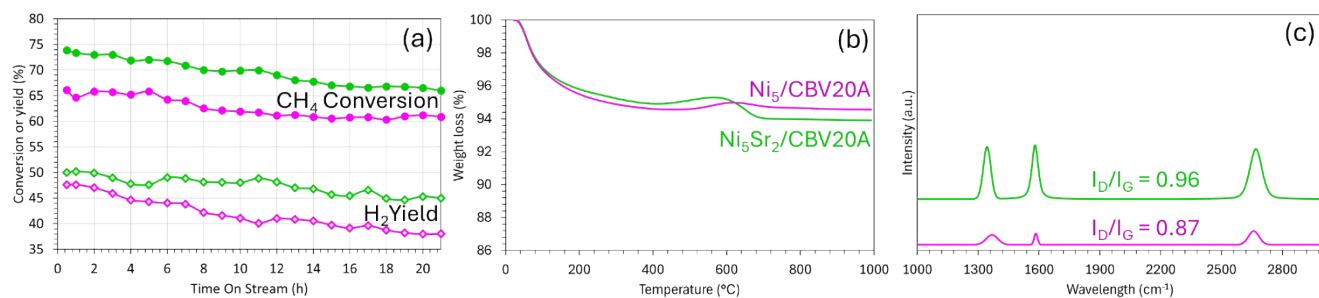

Figure S1: (a) CH<sub>4</sub> conversion (filled symbols) and H<sub>2</sub> yield (empty symbols), (b) TGA results and (c) Raman spectra of  $\text{Ni}_5/\text{CBV20A}$  (plots in purple) and  $\text{Ni}_5\text{Sr}_2/\text{CBV20A}$  (plots in green) catalysts after evaluation at 700 °C and 1 atm (GHSV = 14,400  $\text{mL.g}^{-1}.\text{h}^{-1}$ ).
